# Supplementary material for: Impact of Melatonin on Oxidative Enzymes and Soluble Metabolites in Salt-Alkali Stressed Poplar (Populus spp.): A Comparative Study of Pretreatment and Post-Treatment Effects
Source: Research Square preprint supplement (doi:10.21203/rs.3.rs-8293236/v1), 2025-12-30
Supplement: Supplementary file 1 [file 98ac3fa1d1571a82c0f2c5c8.xlsx]

## Sheet: Sheet2
Combined salt alkali stress of NaCl and Na2CO3
conductivity		0mol/l	40mol/l	80mol/l	120mol/l	160mol/l
	T1	0.17804	0.180577	0.243652	0.261245	0.283676
		0.20423	0.238144	0.227982	0.276084	0.248311
		0.302857	0.224355	0.221113	0.233389	0.208835
	T2	0.30307	0.295129	0.292365	0.98503	0.638117
		0.297206	0.309826	0.218634	0.836729	0.763514
		0.3791	0.241902	0.230499	0.764663	0.960459
	T3	0.281481	0.47861	0.395588	0.715365	0.813472
		0.36099	0.197051	0.704776	0.727003	0.504216
		0.372926	0.383866	0.344495	0.574737	0.774869
	T4	0.565354	0.946108	0.98613	0.898566	0.853933
		0.453256	0.695464	0.813986	0.822099	0.87868
		0.343405	0.686321	0.856923	0.801991	0.959685
	T5	0.323543	0.946108	0.98613	0.898566	0.853933
		0.453256	0.695464	0.813986	0.822099	0.87868
		0.343405	0.686321	0.856923	0.801991	0.959685
Chl		0mol/l	40mol/l	80mol/l	120mol/l	160mol/l
	T1	0.149865	0.181624	0.160264	0.166836	0.190133
		0.257961	0.223902	0.238413	0.159222	0.211917
		0.234124	0.192442	0.198249	0.199883	0.216781
	T2	0.355283	0.371631	0.320558	0.165772	0.249396
		0.371156	0.265061	0.23162	0.234997	0.143245
		0.36646	0.344253	0.310881	0.263232	0.308217
	T3	0.213949	0.180283	0.147089	0.152236	0.0454566
		0.151127	0.18296	0.180754	0.0572781	0.150816
		0.12374	0.182912	0.186064	0.102398	0.114937
	T4	0.10379	0.12905	0.0749153	0.125504	0.0793858
		0.18134	0.160841	0.109558	0.066449	0.0560619
		0.0819803	0.105588	0.17576	0.107508	0.0521673
	T5	0.21749	0.154876	0.115637	0.132111	0.0265354
		0.169638	0.250567	0.0844319	0.130546	0.0243259
		0.170433	0.15597	0.170576	0.22689	0.0719272
MDA		0mol/l	40mol/l	80mol/l	120mol/l	160mol/l
	T1	1.5905	10.5235	2.437	4.8315
		1.9445	11.2835	6.7375	2.64	6.7355
		3.009	7.7025	1.742	2.89	21.712
	T2	29.935	24.635	16.339	29.679	52.4015
		39.722	26.8055	15.3625	48.961	24.5715
		26.354	24.4275	30.4565	40.432	47.9115
	T3	11.7465	16.9725	18.3285	20.8415	47.678
		17.404	10.7375	23.0315	24.698	25.675
		14.16	16.9815	21.786	24.1055	56.167
	T4	51.727	18.415	76.664	61.4005	40.327
		36.543	21.708	38.63	46.494	57.4785
		24.945	32.079	73.1275	80.5715	95.91
	T5	84.7625	50.055	68.7985	54.103	121.063
		39.424	40.7575	113.134	61.178	101.722
		47.4515	41.7495	50.7875	90.1945	138.02
SOD		0mol/l	40mol/l	80mol/l	120mol/l	160mol/l
	T1	12.0815	39.2384	48.6667	47.8632	48.1641
		26.9287	134.263	129.308	128.324	187.619
		93.7409	346.512	30.6691	127.969	257.895
	T2	99.2722	1680	1665.05	1600	1377.04
		93.4498	1460	2226.67	1552.63	1908.33
		98.9811	800	500	1574.29	1438.24
	T3	89.5197	772.222	496.947	1891.67	2900
		74.9636	392.442	1875	1181.98	3006.56
		97.2344	1557.89	2990.91	2421.43	2200
	T4	97.0888	1185	1038	383.929	3611.9
		92.5764	1296.08	2469.23	1508.89	3300
		96.2154	2523.08	2167.74	2226.67	3224.53
	T5	96.6521	2821.74	1734.21	2400	3220
		95.3421	2034.38	2875	3575	3683.33
		97.671	2687.5	2684.54	2882.61	2729.17
POD		0mol/l	40mol/l	80mol/l	120mol/l	160mol/l
	T1	430	520	140	200	270
		470	550	320	210	240
		500	670	310	170	280
	T2	620	490	550	10	280
		660	630	370	400	610
		410	610	560	410	300
	T3	90	440	730	80	510
		330	150	1010	460	470
		40	400	590	350	360
	T4	440	830	820	870	1090
		940	960	940	1260	1920
		320	960	1020	2060	2030
	T5	380	1800	2350	3760	3950
		1240	1140	2730	3620	2910
		1060	2320	2070	3420	2300
CAT		0mol/l	40mol/l	80mol/l	120mol/l	160mol/l
	T1	0.230406	0.22818	0.226313	0.232201	0.237047
		0.230801	0.229329	0.232273	0.229688	0.231196
		0.236186	0.226026	0.232667	0.232344	0.242612
	T2	0.243366	0.230944	0.228575	0.227713	0.222292
		0.227282	0.227103	0.222221	0.229903	0.225416
		0.226744	0.230334	0.230047	0.226816	0.22617
	T3	0.234929	0.23615	0.240063	0.223477	0.230657
		0.240242	0.241319	0.241535	0.223549	0.225057
		0.242791	0.230944	0.232165	0.229975	0.226995
	T4	0.241248	0.246812	0.264295	0.252484	0.258408
		0.249612	0.245807	0.282569	0.247997	0.252915
		0.246633	0.250976	0.251048	0.252843	0.255608
	T5	0.228288	0.222544	0.231339	0.228611	0.231375
		0.224626	0.224482	0.222256	0.223441	0.223046
		0.222436	0.223085	0.226134	0.232057	0.227785
PRO		0mol/l	40mol/l	80mol/l	120mol/l	160mol/l
	T1	0.11037	0.114144	0.091278	0.200625	0.27909
		0.13923	0.10593	0.08595	0.06597	0.06819
		0.26133	0.42783	0.18363	0.10371	0.17919
	T2	0.29241	0.36123	0.21471	0.28353	0.62541
		0.22137	0.14811	0.18807	0.76083	0.52329
		0.16143	0.73641	0.20139	0.70977	0.43005
	T3	0.23025	0.22137	0.38121	0.557335	0.60099
		0.20139	0.41229	0.40513	0.55437	0.34125
		0.33237	0.25245	0.388807	0.25911	0.55881
	T4	0.39453	0.35013	0.78525	0.889747	0.88293
		0.16365	0.36567	0.71715	1.00725	0.84519
		0.34125	0.31683	0.84791	0.80383	1.02501
	T5	0.18363	0.67203	1.45791	1.02723	1.37133
		0.24579	0.48333	0.97173	1.24379	1.58505
		0.21693	0.96507	1.24823	0.92511	1.75075
Soluble sugar		0mol/l	40mol/l	80mol/l	120mol/l	160mol/l
	T1	2.66	10.13	10.93	11.28	9.49
		6.69	0.1	0.89	0.12	0.46
		0.35	17.21	0.1	2.43	0.1
	T2	35.34	35.41	35.48	36.51	34.88
		35.18	35.05	35.1	35.11	34.7
		33.81	35.2	35.5	35.73	34.91
	T3	34.99	35.2	35.27	35.4	34.94
		34.57	34.63	34.57	34.67	34.68
		35.35	35.53	35.09	35.36	34.84
	T4	34.33	34.45	34.66	35.31	34.27
		34.89	34.86	34.68	34.26	34.06
		34.99	34.99	34.78	35.84	34.67
	T5	34.25	34.46	34.17	34.6	34.06
		34.98	34.7	35.1	34.89	34.62
		35.21	34.86	35.09	34.63	34.67
sPRO		0mol/l	40mol/l	80mol/l	120mol/l	160mol/l
	T1	45.8824	56.7308	47.1751	42.515	56.6901
		46.1765	42.3567	33.1955	45.0997	49.0066
		62.0588	48.3412	37.9902	52.9032	43.9024
	T2	30.5882	16.3462	105.882	85.4167	58.9431
		33.8235	39.5652	59.3407	113.426	62.8571
		17.9412	56.5574	97.1014	130.97	49.7151
	T3	45.5882	60.9677	51.3228	71.3918	62.0939
		51.7647	53.4091	58.2447	60.274	57.0076
		53.8235	58.7432	46.7442	43.7811	129.261
	T4	40.2941	25.9124	102.817	16.5116	121.831
		40.2941	31.0219	66.791	117.647	65.3631
		78.8235	105.224	14.539	136.585	57.8125
	T5	67.9412	48.9177	82.9646	42.2667	68.7697
		44.1176	66.3333	31.1248	50.1238	51.4815
		55.5882	50	79.3651	55.8333	71.6418
Plant height		T1	T2	T3	T4	T5
	0	18.06	22	25.08	26.35	28.89
		29.16	30	33.22	34.85	37.5
		29.13	35	37.1	39.35	41.27
	40	26.76	33.2	33.06	33.38	34
		23.05	29	30.84	33.77	36.11
		26.2	23	25.5	26.055	28.69
	80	24.5	33.3	35.01	33.47	30.79
		22.42	30.2	31.4	30.27	28.84
		28.05	34.6	33.43	32.53	31.03
	120	17.25	22.6	27.8	23.275	18.62
		21.25	25.5	25.55	22.735	21.33
		31	34	37.22	34.395	31.84
	160	25	32.8	33.13	32.3	29.57
		24	31	32.44	30.16	30.61
		25.7	28	27.76	26.82	26.2
Ground diameter		T1	T2	T3	T4	T5
	0	0.29	0.37	0.42	0.55	0.64
		0.27	0.32	0.42	0.46	0.47
		0.41	0.44	0.54	0.57	0.63
	40	0.28	0.51	0.55	0.59	0.6
		0.28	0.35	0.41	0.46	0.48
		0.27	0.34	0.37	0.39	0.43
	80	0.57	0.6	0.62	0.65	0.66
		0.28	0.32	0.37	0.41	0.41
		0.33	0.38	0.45	0.46	0.47
	120	0.37	0.4	0.44	0.45	0.43
		0.25	0.33	0.37	0.35	0.35
		0.38	0.41	0.42	0.42	0.41
	160	0.36	0.4	0.45	0.46	0.45
		0.37	0.42	0.48	0.47	0.45
		0.36	0.38	0.42	0.42	0.4
Number of blades		T1	T2	T3	T4	T5
	0	14	13	15	15	18
		21	19	23	23	21
		13	16	18	23	26
	40	10	20	20	20	14
		14	17	18	18	15
		14	14	14	17	12
	80	11	13	15	14	8
		13	16	17	15	7
		14	17	18	16	9
	120	13	10	8	3	1
		13	6	5	3	3
		14	7	6	6	3
	160	14	6	4	4	0
		13	4	4	3	0
		14	6	4	0	0
leaf area		T1	T2	T3	T4	T5
	0	41.47	66.97	71.24	59.89	87.26
		24.66	27.93	39.9	40.05	45.53
		25.6	32.8	38.9	52.54	61.74
	40	11.82	37.72	71.65	53.4	67.26
		24.29	42.39	61.47	42.72	48.86
		20.77	35.06	42.4	32.74	57.49
	80	24.47	74.31	86.87	61.88	47.73
		31.07	41.38	76.13	49.53	55.68
		26.61	38.9	83.93	49.81	57.55
	120	27.77	48.23	9.81	28.6	0
		33.03	34.32	39.89	35.75	36.66
		26.77	58.78	103.13	62.89	44.64
	160	20.87	51.38	81	51.08	0
		22.17	23.71	47.01	30.96	0
		22.17	31.78	29.17	27.7	0

## Sheet: Sheet3
Saline alkali stress after different concentrations of melatonin treatment
chlorophyll		0	200	400	600	800	1000
	T1	0.155704	0.118398	0.144328	0.138275	0.170314	0.13562
		0.121671	0.169549	0.150373	0.141444	0.159944	0.186133
		0.12321	0.135663	0.177901	0.121624	0.129264	0.17354
	T2	0.385939	0.303306	0.402387	0.260607	0.102549	0.110366
		0.324358	0.270267	0.245024	0.416162	0.482676	0.31981
		0.17631	0.224885	0.12972	0.287558	0.210044	0.238833
	T3	0.254688	0.211026	0.380452	0.285029	0.312329	0.11223
		0.231529	0.161574	0.235743	0.236096	0.155996	0.222968
		0.176952	0.17137	0.206421	0.236547	0.302432	0.367619
	T4	0.216971	0.239706	0.180519	0.2164	0.165191	0.164715
		0.192825	0.190422	0.188457	0.297122	0.160646	0.16278
		0.125368	0.175289	0.235317	0.19282	0.208421	0.188429
	T5	0.155704	0.218398	0.144328	0.168275	0.170314	0.23562
		0.121671	0.0695492	0.0503728	0.0414441	0.159944	0.186133
		0.22321	0.235663	0.177901	0.216235	0.292638	0.17354
MDA		0	200	400	600	800	1000
	T1	175.273	150.128	160.412	173.459	174.056	177.902
		169.211	104.755	152.86	163.304	175.545	190.771
		94.4778	82.3732	80.4472	120.663	81.2862	114.351
	T2	110.899	72.8558	96.2747	77.0473	99.2278	88.3793
		152.874	199.725	185.689	101.894	107.094	47.6752
		163.853	105.879	122.262	165.972	165.204	177.344
	T3	130.077	145.995	137.479	152.762	166.373	136.099
		141.324	137.571	119.56	151.439	151.645	117.086
		141.174	120.144	125.336	139.914	130.961	148.207
	T4	172.185	156.032	164.013	150.204	144.38	133.434
		168.742	149.758	153.859	168.231	169.68	176.01
		168.077	157.014	162.076	155.789	139.26	151.383
	T5	153.413	164.255	170.28	146.205	138.56	135.144
		174.377	133.78	145.294	165.593	185.857	189.857
		152.637	151.367	169.1	122.637	147.451	134.018
SOD		0	200	400	600	800	1000
	T1	64.3377	91.008	91.2664	64.3377	83.5884	91.2664
		90.5386	50.8763	58.5444	69.4323	76.2664	91.2664
		55.6332	57.8166	62.1543	94.1776	69.4323	65.7933
	T2	94.1776	83.5884	51.5651	87.6274	86.1718	93.4058
		75.2507	66.5211	55.6332	82.5328	76.7103	57.0557
		90.9054	57.8166	63.0713	55.6332	74.3086	81.8009
	T3	57.5691	57.0888	65.0655	57.0888	57.0888	91.5942
		70.1601	70.1601	91.008	72.8526	86.1718	89.1557
		92.7216	58.5444	60.0803	82.5328	83.2606	85.8108
	T4	80.7162	91.5571	83.2569	83.5884	82.5328	86.8556
		85.4436	57.7871	69.4323	78.1659	81.8009	90.9054
		64.3377	57.7871	90.5386	92.7216	64.3377	62.8821
	T5	83.2606	70.5269	60.6587	91.2664	83.5884	83.2606
		90.9054	59.2722	67.5767	75.2507	83.5884	91.2664
		56.3606	87.6274	93.4058	80.7162	93.4058	51.2373
POD		0	200	400	600	800	1000
	T1	950	1800	1140	1060	900	790
		1620	2600	2130	1730	1510	930
		1690	2960	2220	1900	1680	820
	T2	1560	2510	2190	1910	1280	770
		1200	2210	1690	1410	1120	870
		1660	3150	2670	1830	1360	800
	T3	1530	2910	2070	1750	1380	950
		1440	2870	2050	1490	1220	810
		1150	2590	1960	1620	1030	1130
	T4	1120	2210	1800	1370	950	840
		1520	2620	1940	1610	1380	1260
		1370	2620	2160	1600	1240	980
	T5	1780	2820	2410	2130	1520	1280
		1530	2290	2040	1830	1660	1240
		1410	3130	2500	2190	1480	1150
CAT		0	200	400	600	800	1000
	T1	1204	1560	871	799	576	458
		1311	1778	1260	765	682	573
		1128	1339	998	770	620	481
	T2	1281	1362	1106	688	480	413
		1460	1582	754	485	462	444
		1126	1280	737	561	414	405
	T3	1232	1449	1198	1033	988	716
		1280	1557	1287	1197	751	728
		1465	1814	1215	1072	741	630
	T4	973	1134	889	759	616	601
		782	1147	1012	796	749	654
		896	1358	897	807	646	579
	T5	877	1107	825	760	675	525
		826	839	595	661	567	465
		757	1137	641	585	391	378
Soluble sugar		0	200	400	600	800	1000
	T1	0.182033	0.183731	0.185177	0.186624	0.18675	0.187127
		0.189517	0.190083	0.190083	0.190775	0.190838	0.191467
		0.18524	0.187441	0.187882	0.188574	0.191089	0.191215
	T2	0.189517	0.193794	0.195681	0.195869	0.197819	0.198134
		0.189643	0.192033	0.192725	0.192976	0.193039	0.193605
		0.195932	0.196939	0.197379	0.198448	0.199203	0.20197
	T3	0.193982	0.194171	0.1948	0.195995	0.198574	0.199769
		0.191467	0.192913	0.193039	0.19392	0.19392	0.195115
		0.192976	0.193228	0.194926	0.194989	0.195618	0.195618
	T4	0.188825	0.188888	0.18958	0.190397	0.194297	0.196876
		0.185869	0.186561	0.18763	0.189202	0.193039	0.196624
		0.188385	0.189328	0.190901	0.192662	0.194863	0.198071
	T5	0.194926	0.198825	0.199454	0.200272	0.201593	0.20197
		0.192976	0.195806	0.196561	0.197379	0.198322	0.198637
		0.200901	0.202914	0.203039	0.203354	0.204423	0.205241
soluble protein		0	200	400	600	800	1000
	T1	132.059	74.1176	79.1176	100.588	113.824	181.471
		120.294	59.4118	101.176	105.588	114.412	151.765
		146.176	53.8235	115.882	116.176	131.176	166.765
	T2	170.588	127.647	147.353	148.824	160.882	174.412
		151.176	116.176	130.882	139.412	140.588	155.588
		161.765	110	121.765	122.353	145.294	201.176
	T3	178.824	112.059	113.529	143.235	154.118	179.706
		135.294	80	112.647	120.882	122.941	248.824
		197.059	52.9412	97.9412	104.706	113.529	215.882
	T4	226.471	139.118	167.353	179.412	202.941	242.647
		243.824	201.176	205.882	215.294	222.353	253.235
		255	99.1176	180	216.471	217.353	280.882
	T5	290.294	182.941	198.529	205.294	241.176	315.882
		257.941	177.941	226.765	234.412	239.118	260
		314.412	207.353	251.765	255.882	267.059	316.471
Plant height		T1	T2	T3	T4	T5
	0	40.05	42.4	44.33	43.84	43.11
		33.74	34.76	36.48	36.21	36.29
		30.34	31.14	31.25	31.75	31.31
	200	25.53	26.45	29.52	32.65	33.84
		26.08	27.73	32.04	38.94	41.05
		28.37	29.53	29.97	31.05	32.06
	400	19.04	23.66	27.94	31.69	33.31
		25.96	28.46	30.04	33.45	35.34
		24.28	27.66	32.7	38.85	40.92
	600	31.07	35.14	38.79	40.43	43.1
		28.89	29.35	33.5	42.68	44.1
		19.07	21.34	25.23	26.17	28.94
	800	33.1	33.94	35.83	38.22	38.91
		27.34	30.59	31.66	33.93	36.99
		32.68	34.18	36.45	39	39.46
	1000	33.38	35.4	38.13	40.09	41.01
		29.63	40.05	40.06	40.9	41.29
		31.8	32.95	34.55	34.56	35.68
Ground diameter		T1	T2	T3	T4	T5
	0	0.85	0.88	0.84	0.76	0.74
		0.69	0.7	0.67	0.64	0.61
		0.47	0.48	0.44	0.42	0.38
	200	0.63	0.69	0.68	0.72	0.68
		0.47	0.8	0.71	0.93	0.78
		0.63	0.8	0.73	0.77	0.94
	400	0.64	0.68	0.72	0.79	0.81
		0.62	0.69	0.73	0.76	0.77
		0.69	0.73	0.75	0.78	0.78
	600	0.56	0.59	0.61	0.62	0.67
		0.61	0.64	0.67	0.81	0.83
		0.57	0.63	0.65	0.69	0.7
	800	0.49	0.52	0.57	0.59	0.59
		0.42	0.48	0.53	0.58	0.61
		0.57	0.58	0.73	0.76	0.78
	1000	0.67	0.69	0.73	0.71	0.75
		0.66	0.65	0.68	0.71	0.74
		0.68	0.71	0.73	0.76	0.73
Number of blades		T1	T2	T3	T4	T5
	0	15	7	5	3	0
		14	7	3	0	0
		11	5	3	2	0
	200	13	12	7	8	6
		14	14	11	5	6
		20	12	6	10	7
	400	17	16	13	9	6
		13	11	9	8	5
		12	17	12	8	7
	600	16	10	10	11	7
		15	13	10	7	7
		18	13	8	5	6
	800	12	15	9	8	8
		12	10	12	7	8
		13	13	9	10	9
	1000	13	11	11	5	4
		12	14	7	9	8
		13	14	9	5	5
leaf area		T1	T2	T3	T4	T5
	0	94.75	85.09	61.61	44.59	0
		81.33	64.38	53.48	34.46	0
		68.9	45.22	45.93	26.09	0
	200	80.76	73.77	70.29	61.07	58.17
		76.06	75.01	67.12	55.32	41.45
		89.66	82.94	66.38	55.85	42.35
	400	75.7	74.18	72.45	66.8	63.59
		81.83	76.65	74.37	69.38	65.86
		70.6	66.84	64.59	60.64	55.22
	600	69.36	65.25	63.93	59.91	53.84
		80.72	77.42	70.4	66.11	63.31
		72.67	73.81	71.6	67.87	64.57
	800	70.75	65.47	61.2	57.54	53.88
		64.01	62.43	58.7	55.03	50.26
		77.69	74.54	69.75	66.75	62.3
	1000	80	78.44	73.74	68.5	62.34
		81.06	75.17	70.91	64.23	58.99
		90.07	83.25	75.35	70.78	64.4

## Sheet: Sheet1
Different concentrations of melatonin treatment after saline alkali stress
	0	200	400	600	800	1000
T1	0.253309	0.166754	0.301728	0.297464	0.164514	0.284899
	0.212621	0.252747	0.131869	0.174731	0.189524	0.336734
	0.211182	0.252799	0.278024	0.145295	0.24972	0.263383
T2	0.230782	0.109666	0.117609	0.199862	0.164406	0.197194
	0.214528	0.277319	0.180275	0.255238	0.162357	0.188892
	0.120221	0.208397	0.353264	0.200164	0.17333	0.263781
T3	0.131709	0.238137	0.177935	0.158383	0.159429	0.182856
	0.186051	0.196753	0.230358	0.124467	0.13471	0.135389
	0.1808	0.333711	0.333759	0.284376	0.170338	0.184469
T4	0.285154	0.126962	0.139778	0.144994	0.105338	0.141604
	0.124692	0.126681	0.115988	0.182744	0.172403	0.164277
	0.127286	0.189729	0.172477	0.158214	0.338749	0.319153
T5	0.182701	0.150907	0.142867	0.157349	0.160136	0.118509
	0.143429	0.141116	0.142432	0.14632	0.169096	0.125574
	0.152401	0.178206	0.104227	0.181559	0.140234	0.322447
	0	200	400	600	800	1000
T1	116.252	91.8388	82.5833	75.0828	55.6313	40.8047
	117.511	97.4693	38.2358	46.7852	42.9787	43.5977
	137.045	118.261	80.0547	53.9763	47.3753	56.6108
T2	130.58	117.483	91.7933	82.3273	73.2952	65.1732
	133.006	116.214	88.1962	86.8872	85.1188	78.3427
	142.723	86.5782	72.5817	69.2108	59.1217	49.3308
T3	154.909	125.807	117.562	92.7032	75.8978	65.5833
	161.731	127.552	123.215	113.168	98.3328	82.3312
	158.452	126.484	132.912	129.26	100.143	85.8413
T4	174.386	158.805	151.615	149.901	145.09	97.7348
	169.367	155.483	129.233	114.102	86.7392	82.8372
	188.425	156.259	137.165	124.17	105.771	85.5443
T5	181.733	152.415	167.553	126.985	106.976	79.0717
	225.004	177.155	157.821	125.315	109.897	84.6382
	184.298	163.556	127.388	96.8342	92.3227	87.0952
	0	200	400	600	800	1000
T1	83.0131	36.7249	48.952	71.6594	81.7031	89.5633
	86.9432	69.9127	74.7162	77.3362	84.7598	89.1266
	85.6332	64.4105	61.5284	65.9825	82.5764	87.8166
T2	86.5066	65.5459	78.6463	79.9563	86.0699	89.1266
	85.1965	68.1659	68.6026	70.786	75.5895	88.2533
	84.7598	62.4891	79.083	80.8297	84.3231	87.8166
T3	77.3362	59.869	63.3624	74.2795	75.0655	81.2664
	84.3231	31.9214	66.8559	76.0262	77.3362	85.6332
	84.7598	62.0524	67.2926	82.1397	83.0131	87.3799
T4	76.8996	32.7948	55.5022	62.4891	75.5895	85.6332
	86.5066	62.9258	73.8428	75.1528	77.7729	88.2533
	84.7598	36.7249	55.9389	79.083	80.8297	88.2533
T5	88.69	68.1659	85.1965	85.6332	88.69	89.1266
	86.0699	47.2052	76.4629	77.3362	81.7031	88.2533
	86.9432	61.179	79.5197	80.8297	86.5066	88.2533
	0	200	400	600	800	1000
T1	2660	3850	3080	3020	2580	2510
	2490	3880	2890	2870	2380	2220
	1620	2920	1980	1660	1610	530
T2	1440	2900	2830	1780	1300	1100
	1400	2690	2030	1980	960	790
	1500	2640	2360	1560	1340	1300
T3	1660	2440	2020	1730	1560	1550
	1970	2440	2350	2050	1850	1510
	2180	2830	2800	2380	1760	1160
T4	1840	2830	2060	1870	1760	550
	860	1870	1530	1230	620	520
	790	1840	1480	1150	530	500
T5	510	1790	1000	970	450	400
	450	1220	950	930	440	470
	670	970	850	720	480	460
	0	200	400	600	800	1000
T1	575.499	688.225	629.349	535.65	522.726	455.234
	531.342	654.12	596.321	528.47	523.085	491.852
	608.168	690.738	671.352	576.576	574.063	501.904
T2	848.339	1024.61	855.519	766.487	682.481	650.171
	966.091	1084.2	1076.3	950.295	659.864	465.645
	945.628	993.734	954.962	821.773	804.9	573.345
T3	707.252	809.926	727.715	556.113	546.779	512.315
	697.918	766.846	730.228	648.735	626.118	588.423
	690.738	763.256	701.508	648.017	598.116	430.104
T4	626.118	660.223	648.376	597.757	589.859	486.467
	525.957	605.655	547.856	522.008	518.777	436.566
	536.368	1222.78	674.224	532.419	482.877	419.693
T5	706.893	743.152	720.176	590.218	589.5	533.496
	677.814	760.384	706.175	637.247	562.216	531.342
	686.43	766.487	688.225	644.427	581.961	496.519
	0	200	400	600	800	1000
T1	3.9438	3.80984	3.86248	3.93625	3.96015	4.02399
	3.90858	3.78468	3.81846	3.90858	3.92242	4.00764
	3.92619	3.76959	3.81594	3.91487	3.92871	3.99883
T2	3.9677	3.73688	3.82726	3.91361	4.00921	4.07305
	3.88594	3.75198	3.7933	3.86456	3.89474	3.96739
	3.98028	3.79852	3.8977	3.97651	4.01047	4.07305
T3	3.82808	3.68279	3.7455	3.8155	3.83562	3.89569
	3.81801	3.67021	3.70273	3.8004	3.83437	3.88562
	3.86078	3.70795	3.75682	3.85198	3.90229	3.95984
T4	3.94632	3.8199	3.86877	3.94129	3.95009	4.00764
	3.88468	3.77588	3.80588	3.87713	3.88971	3.95355
	4.00795	3.81613	3.90777	3.99034	4.01047	4.07431
T5	3.71612	3.60354	3.63732	3.71235	3.71738	3.83782
	3.79411	3.59977	3.6499	3.7438	3.79663	3.92839
	3.79789	3.65134	3.71657	3.79537	3.80543	3.9133
	0	200	400	600	800	1000
T1	1042.94	833.824	974.118	1024.41	1183.24	1365.88
	1172.65	677.647	923.824	1061.47	1249.41	1429.41
	1072.06	794.118	878.824	955.588	1183.24	1220.29
T2	1233.53	513.529	828.529	913.235	1236.18	1318.24
	1114.41	857.647	868.235	1024.41	1463.82	1839.71
	1498.24	1093.24	1122.35	1143.53	1575	1585.59
T3	1170	645.882	839.118	1066.76	1244.12	1479.71
	1050.88	516.176	627.353	918.529	1193.82	1530
	1119.71	812.647	844.412	1119.71	1355.29	1371.18
T4	2160	1614.71	1672.94	2141.47	2366.47	2408.82
	2128.24	942.353	1985.29	2059.41	2130.88	2787.35
	1672.94	1273.24	1400.29	1665	1829.12	2649.71
T5	2223.53	1551.18	1834.41	2136.18	2347.94	2496.18
	2263.24	1400.29	2157.35	2223.53	2342.65	2700
	2043.53	627.353	1720.59	1731.18	2284.41	2692.06
	T1	T2	T3	T4	T5
0	37.91	38.86	40.46	39.97	39.35
	32	34.01	35.11	35.74	35.18
	34.52	37.27	38.29	38.95	38.06
200	30.96	34.23	34.24	34.01	34.08
	25.91	38.29	41.74	35.91	27.07
	34.56	38.85	41.69	35.66	35.27
400	37.65	40.64	44.82	46.88	48.89
	32.88	39.34	42.81	43.6	45.71
	35	39.87	40.81	41.61	42.59
600	29.57	30.8	33.52	34.49	36.78
	30.92	33.07	36.9	38.17	39.82
	30.18	33.87	35.5	38.86	39.23
800	35.58	38.49	39.67	41.82	43.61
	39.18	41.25	43.64	45.11	47.69
	34.77	36.42	38.03	41.87	42.2
1000	35.7	38.58	40.77	42.59	43.88
	33.22	35.94	37.45	38.62	40.23
	26.53	27.82	29.51	31.55	33.27
	T1	T2	T3	T4	T5
0	0.86	0.87	0.73	0.67	0.67
	0.78	0.81	0.77	0.77	0.77
	0.55	0.59	0.63	0.6	0.6
200	0.85	0.78	0.73	0.67	0.68
	0.73	0.87	0.78	0.72	0.7
	0.85	0.8	0.76	0.73	0.66
400	0.86	0.83	0.84	0.84	0.83
	0.77	0.76	0.95	0.61	0.8
	0.68	0.83	0.77	0.81	0.73
600	0.68	0.67	0.72	0.76	0.79
	0.79	0.75	0.76	0.78	0.71
	1.03	0.67	0.91	0.69	0.74
800	0.75	0.78	0.78	0.82	0.87
	0.68	0.71	0.72	0.76	0.77
	0.76	0.81	0.88	0.9	0.89
1000	0.66	0.65	0.67	0.68	0.67
	0.79	0.78	0.81	0.85	0.86
	0.72	0.73	0.75	0.72	0.69
	T1	T2	T3	T4	T5
0	10	9	9	2	0
	8	7	6	2	0
	12	7	8	1	0
200	9	6	4	6	2
	12	10	7	9	0
	14	11	9	11	4
400	14	12	9	8	3
	16	13	11	8	3
	11	9	8	9	3
600	14	10	11	9	3
	15	8	8	8	2
	14	11	7	5	3
800	11	12	10	6	4
	13	6	6	3	3
	11	9	7	5	4
1000	13	9	8	7	4
	12	10	5	3	3
	11	8	6	5	3
	T1	T2	T3	T4	T5
0	75.28	52.71	43.63	41.31	0
	82.33	61.62	49.31	35.56	0
	71.35	50.73	40.14	37	0
200	83.53	67.86	63.04	60.86	49.74
	86.51	76.27	68.33	39.64	0
	59.99	53.9	49.01	43.93	40.02
400	79.29	60.31	59.1	53.74	49.46
	74.86	68.85	61.9	53.83	48.15
	87.42	76.87	70.81	67.63	59.37
600	81.9	74.87	67.39	60.45	53.6
	76.41	70.49	63.04	55.71	48.58
	77.89	72.38	67.03	61.92	56.75
800	72.15	70.08	64.79	61.97	55
	89.21	86.07	81.92	77.21	69
	78.59	73.6	67.03	62.93	57
1000	71.36	66.02	62.42	57.63	50
	89.11	80.47	76.66	69.54	57.94
	87.13	80.64	72.29	66.88	59.54
